# Supplementary material for: Designing string-of-beads vaccines with optimal spacers
Source: PubMed Central journal article supplement (PMC4728757; doi:10.1186/s13073-016-0263-6), 2016-01-26

# Influence of $\alpha$ and $\beta$ with fixed spacer length $k=3$

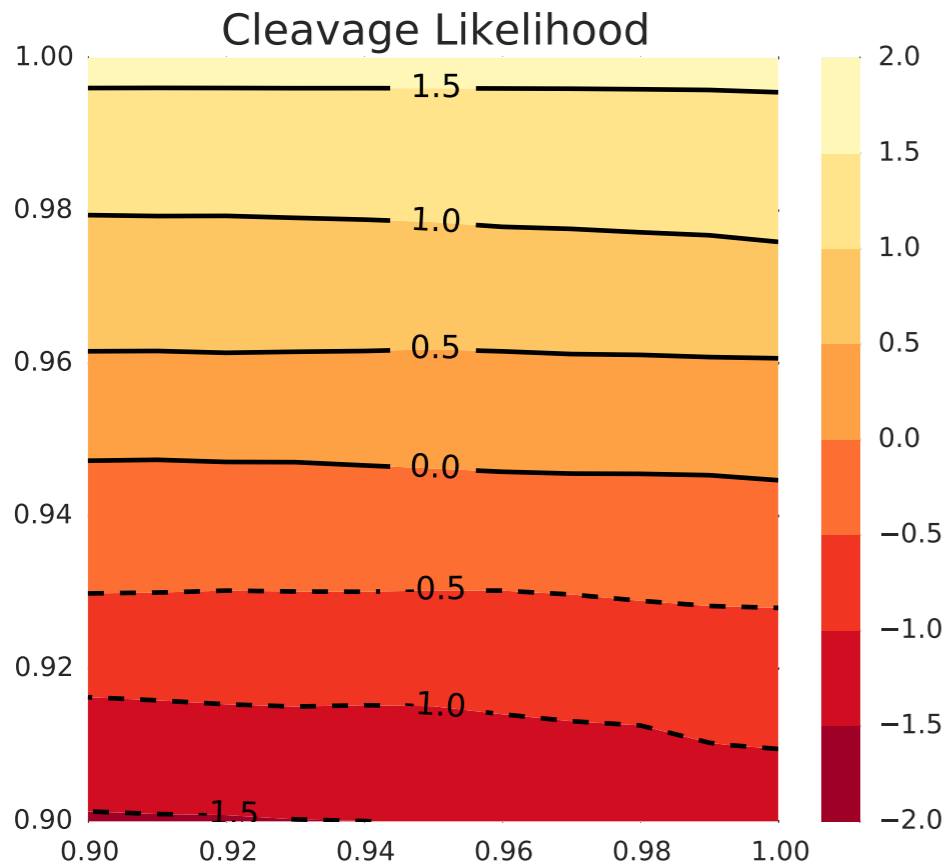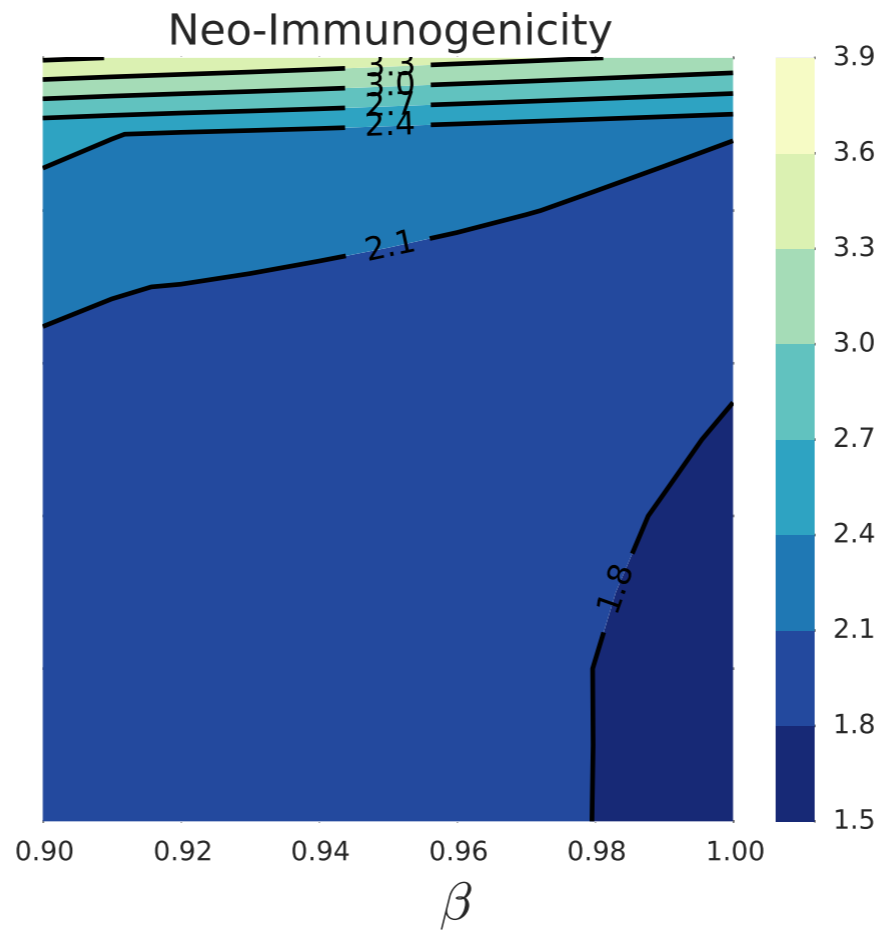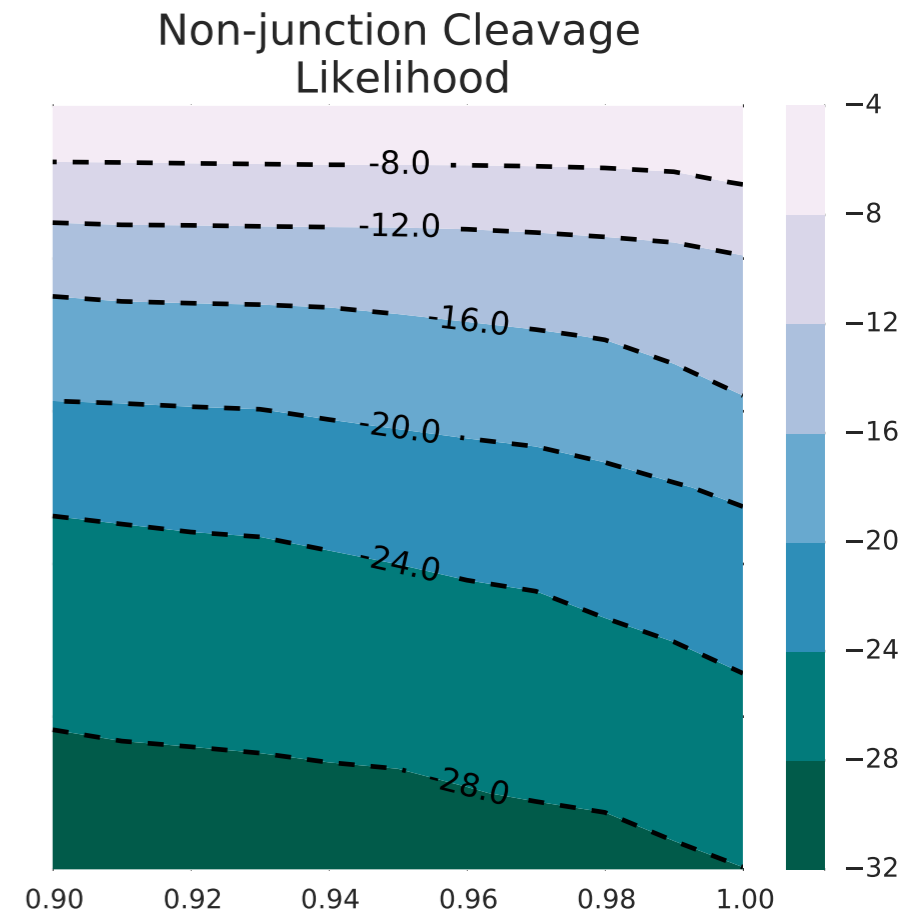

Supplement: 13073_2016_263_MOESM2_ESM.pdf [file 13073_2016_263_MOESM2_ESM.pdf]
